# Supplementary material for: Depletion force optimization for high-purity gold nanotriangles prepared using different growth methods
Source: Royal Society of Chemistry journal article supplement (doi:10.1039/d3ra05955c), 2023-01-01
Supplement: d3ra05955c1.pdf [file d3ra05955c1.pdf]

1

Supporting Information for

2 **Depletion Force Optimization for High-Purity Gold**  
3 **Nanotriangles Prepared Using Different Growth Methods**

4 Ryuichi Yamada, Ryusei Kimura, and Shota Kuwahara\*

5 Graduate School of Science, Toho University, 2-2-1 Miyama, Funabashi, Chiba 274-8510, Japan

6

7

8

1 **Table S1.** TEM analysis of the size and purity of seed-mediated growth AuNTs in the  
2 samples shown in Figures 1 and 2. 50 AuNTs were counted for the analysis, except for  
3 the seed solution of 1.0 mL (400 and 387 AuNTs were counted before and after the  
4 purification, respectively).

| Seed<br>/mL | $\lambda_{\max}$<br>/nm | Edge<br>/nm | Purity (as<br>synthesized)<br>/% | Purity<br>(precipitate)<br>/% | Diameter of<br>spherical<br>AuNPs<br>/nm |
|-------------|-------------------------|-------------|----------------------------------|-------------------------------|------------------------------------------|
| 0.1         | 707                     | 133±10      | 46                               | 56                            | 81±6                                     |
| 0.15        | 692                     | 117±7       | 51                               | 55                            | 78±6                                     |
| 0.2         | 683                     | 104±6       | 41                               | 66                            | 67±3                                     |
| 0.4         | 665                     | 82±7        | 55                               | 81                            | 53±3                                     |
| 0.6         | 656                     | 70±6        | 50                               | 84                            | 47±3                                     |
| 0.8         | 649                     | 63±5        | 60                               | 72                            | 41±3                                     |
| 1.0         | 644                     | 56±4        | 54                               | 78                            | 38±2                                     |
| 1.2         | 643                     | 48±4        | 36                               | 53                            | 34±2                                     |
| 1.4         | 638                     | 45±3        | 38                               | 46                            | 31±2                                     |

5

6

7

1 **Table S2.** TEM analysis of the purity of AuNTs for the samples shown in Figure 3. 50

2 AuNTs were counted for the analysis.

| Seed<br>/mL | Edge<br>/nm | Purity (as<br>synthesized)<br>/% | Purity<br>(precipitate)<br>/% |
|-------------|-------------|----------------------------------|-------------------------------|
| 0.4         | 82±7        | 55                               | 81                            |
| 0.6         | 70±6        | 50                               | 84                            |
| 0.8         | 63±5        | 60                               | 72                            |
| 1.0         | 56±4        | 54                               | 78                            |

3

4

1 **Table S3.** TEM analysis of the size and purity of seedless growth AuNTs in the samples  
2 shown in Figures 4 and 5. 50 AuNTs were counted for the analysis, except for the edge  
3 length of 49 nm (345 and 301 AuNTs were counted before and after the purification,  
4 respectively).

| Edge<br>/nm | $\lambda_{\max}$<br>/nm | CTAC<br>/M | KI<br>/mM | AA<br>/mM | Purity (as<br>synthesized)<br>/% | Purity<br>(precipitate)<br>/% | Diameter of<br>spherical<br>AuNPs<br>/nm |
|-------------|-------------------------|------------|-----------|-----------|----------------------------------|-------------------------------|------------------------------------------|
| 104±6       | 688                     | 0.1        | 25        | 64        | 46                               | 96                            | 55±3                                     |
| 90±6        | 670                     | 0.1        | 25        | 100       | 35                               | 92                            | 59±3                                     |
| 80±4        | 663                     | 0.1        | 5         | 64        | 55                               | 63                            | 57±5                                     |
| 69±6        | 652                     | 0.1        | 10        | 100       | 60                               | 79                            | 49±2                                     |
| 59±2        | 640                     | 0.1        | 10        | 64        | 55                               | 92                            | 41±2                                     |
| 50±3        | 631                     | 0.1        | 75        | 64        | 43                               | 93                            | 34±2                                     |
| 49±2        | 626                     | 0.05       | 10        | 100       | 38                               | 93                            | 35±3                                     |

5

6

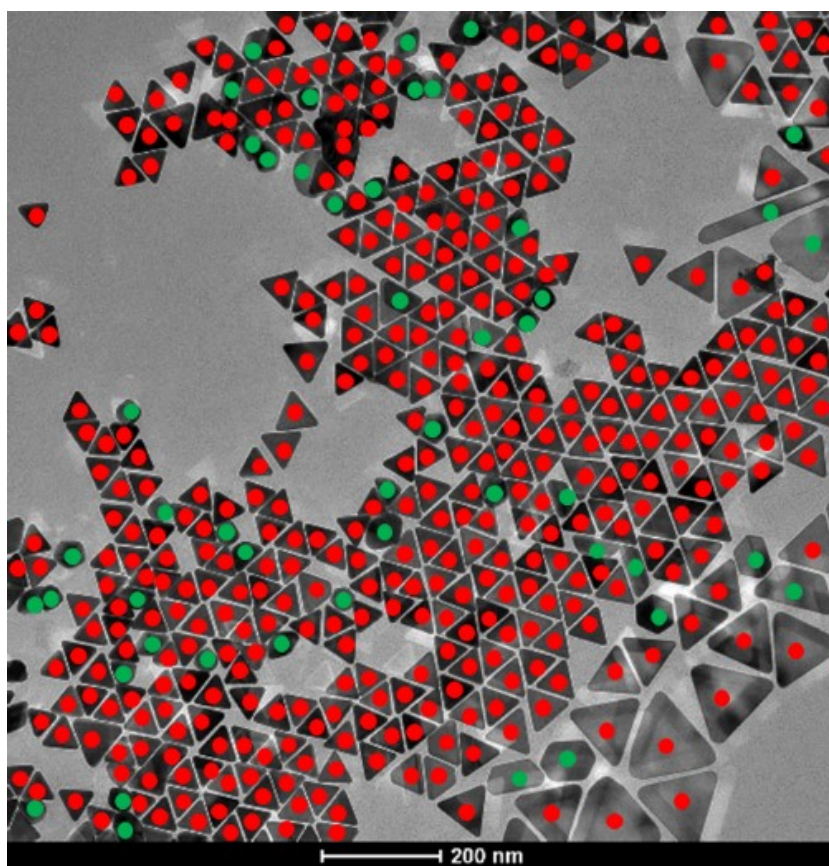

1  
2

3 **Figure S1.** A large area TEM image for counting AuNTs in a sample. The particles were  
4 discriminated by their shape by color dots into AuNTs (red) other shapes of AuNPs  
5 (green).
